# Supplementary figures and images for: Comparative Study of XGBoost and Logistic Regression for Predicting Sarcopenia in Postsurgical Gastric Cancer Patients
Source: Research Square preprint supplement (doi:10.21203/rs.3.rs-5738884/v1), 2025-04-02

Table 1General Information Analysis of the Research Object


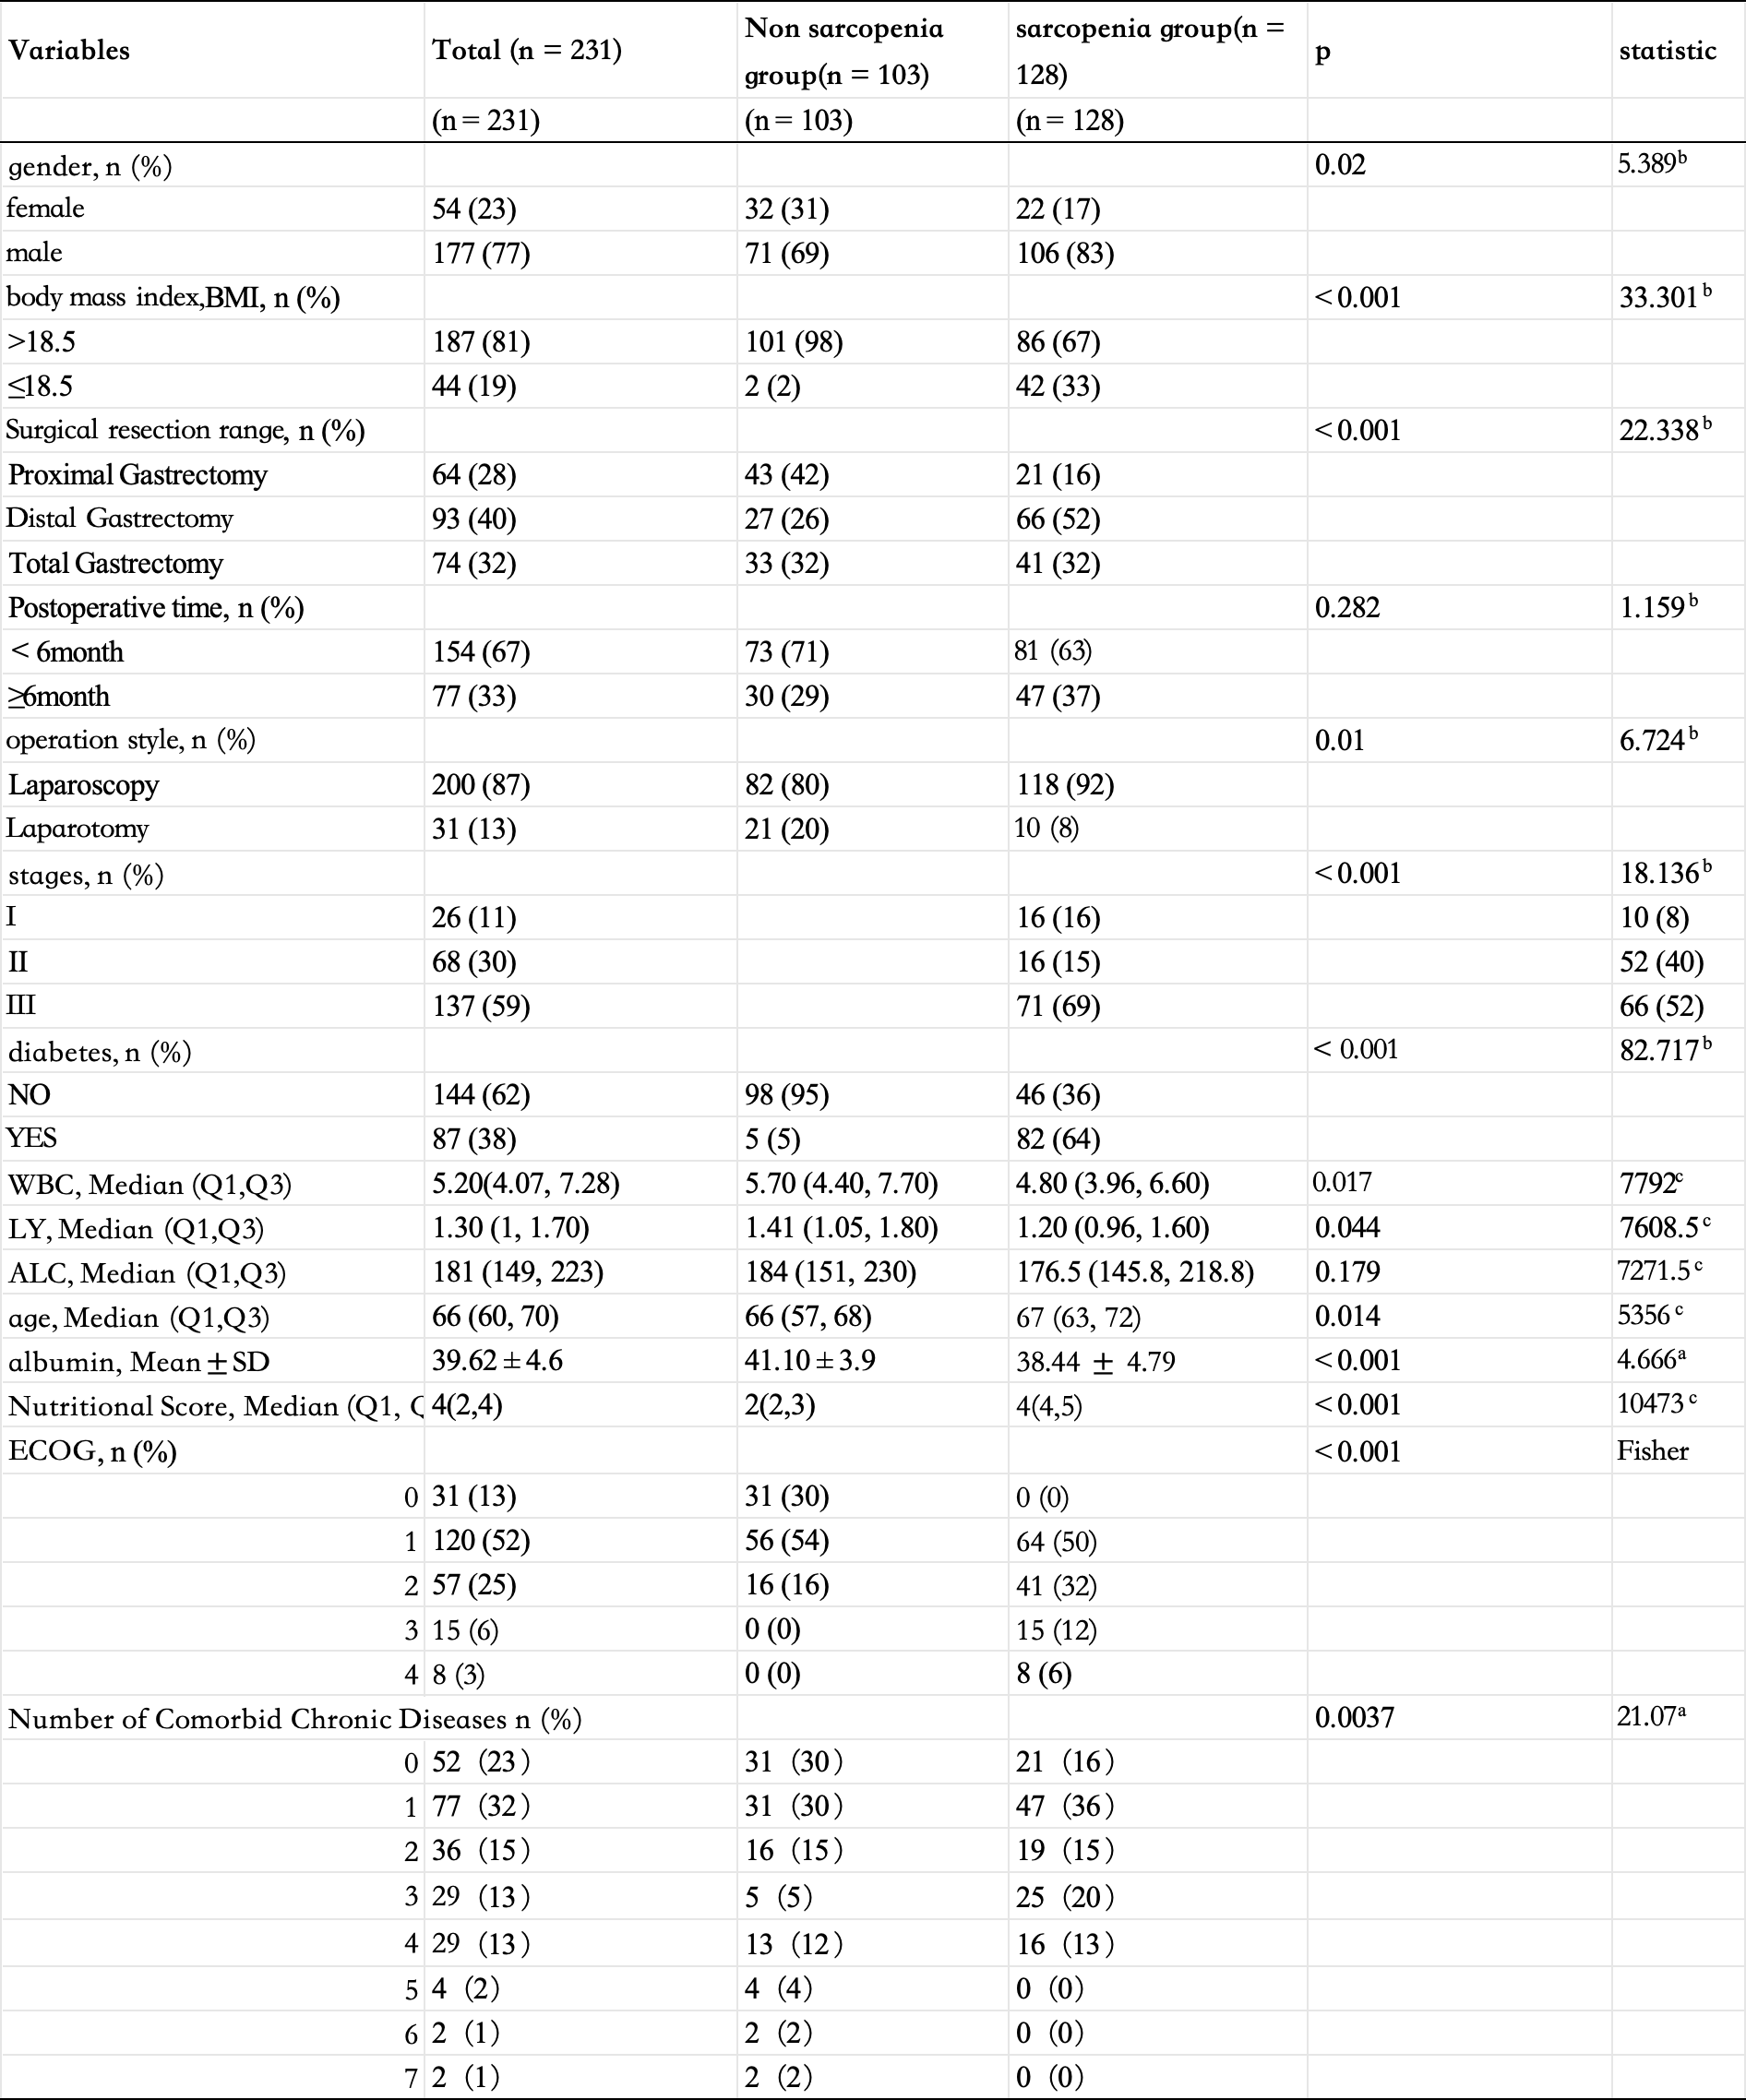

Supplement: Supplementary file 1 [file d1569bd70d0dadf940e87669.docx]
